# Supplementary material
Source: PubMed Central journal article supplement (PMC4954446)
Supplement: supp_2015-0215_Supplemental_Table.pdf [file supp_2015-0215_Supplemental_Table.pdf]

**Supplemental Table – Li et al.**

Supplemental table. Primers used in Quantitative PCR

| <b>Gene</b>                     | <b>Forward primer sequence</b> | <b>Reverse Primer sequence</b> |
|---------------------------------|--------------------------------|--------------------------------|
| <b>Comp</b>                     | GAATATCATCTGGGCTAACCTGC        | CCCCCACATACATTCTTTATTTGC       |
| <b>Fn</b>                       | GCCACACCTACAACCAGTATACA        | GGGCTGGATGGAAAGATTACT          |
| <b>Thbs4</b>                    | TCAAGGAAACATCATTTTTGCG         | CGTCCCTGGTGTCCGTGCATC          |
| <b>Col1<math>\alpha</math>1</b> | TGCTGCCTTTTCTGTTTCCTT          | AAGGTGCTGGGTAGGGAAGT           |
| <b>Tnmd</b>                     | CCAGACAAGCAAGCGAGGA            | AACTTCCTATTAGACTCTCC           |
| <b>Fmod</b>                     | CTGCTGTATGTCCGGCTGTCTC         | GCTGCGCTTGATCTCGTTCC           |
| <b>TenC</b>                     | CAGAAGCTGAACCGGAAGTTG          | GGCTGTTGTTGCTATGGCACT          |
| <b>Scx</b>                      | AACACGGCCTTCACTGCGCTG          | CAGTAGCACGTTGCCAGGTG           |
| <b>Mkx</b>                      | AGTGGCTTTACAAGCACCGT           | ACACTGAGCCGCTCGGCGTT           |
| <b>Egr1</b>                     | GAGCCTGCACCCAACAGTG            | TGGGGCTCAGGAAAAATGTCA          |
| <b>Rpl 19</b>                   | CTGAAGGTCAAAGGGAATGTG          | GGACAGAGTCTTGATGATCTC          |
